# Supplementary material for: Inter-diffusion of Cu2+ ions into CuS nanocrystals confines the microwave absorption properties
Source: Royal Society of Chemistry journal article supplement (doi:10.1039/c8ce01435c), 2018-01-01
Supplement: c8ce01435c1.pdf [file c8ce01435c1.pdf]

***Electronic Supporting Information***

***for***

**Inter-diffusion of Cu<sup>2+</sup> Ions to CuS Nanocrystals and the Confinement Effect  
on Microwave Absorption Properties**

Jiani Gu<sup>a</sup>, Yi Xie<sup>a\*</sup>, Wenhui Chen<sup>a</sup>, Chao Hu<sup>a</sup>, Zhiyuan Xu<sup>b</sup>, Fen Qiao<sup>c</sup>, Xiaoqing Liu<sup>d</sup>,  
Xiujian Zhao<sup>a</sup>, Gaoke Zhang<sup>a\*</sup>

<sup>a</sup> *State Key Laboratory of Silicate Materials for Architectures, Wuhan University of Technology (WUT), No. 122, Luoshi Road, Wuhan 430070, P. R. China*

<sup>b</sup> *School of Energy & Power Engineering, Jiangsu University, Zhenjiang, 212013, P. R. China*

<sup>c</sup> *State Key Laboratory of Advanced Technology for Materials Synthesis and Processing, Wuhan University of Technology (WUT), No. 122, Luoshi Road, Wuhan 430070, P. R. China*

<sup>d</sup> *Center for Materials Research & Testing, Wuhan University of Technology, Wuhan, Hubei 430070, P.R. China*

*Email: xiey@whut.edu.cn; gkzhang@whut.edu.cn*

## 1. Characterization of $\text{Cu}_{2-x}\text{S}$ NCs achieved by reacting $\text{CuS}$ with different amounts of $\text{Cu}^{2+}$

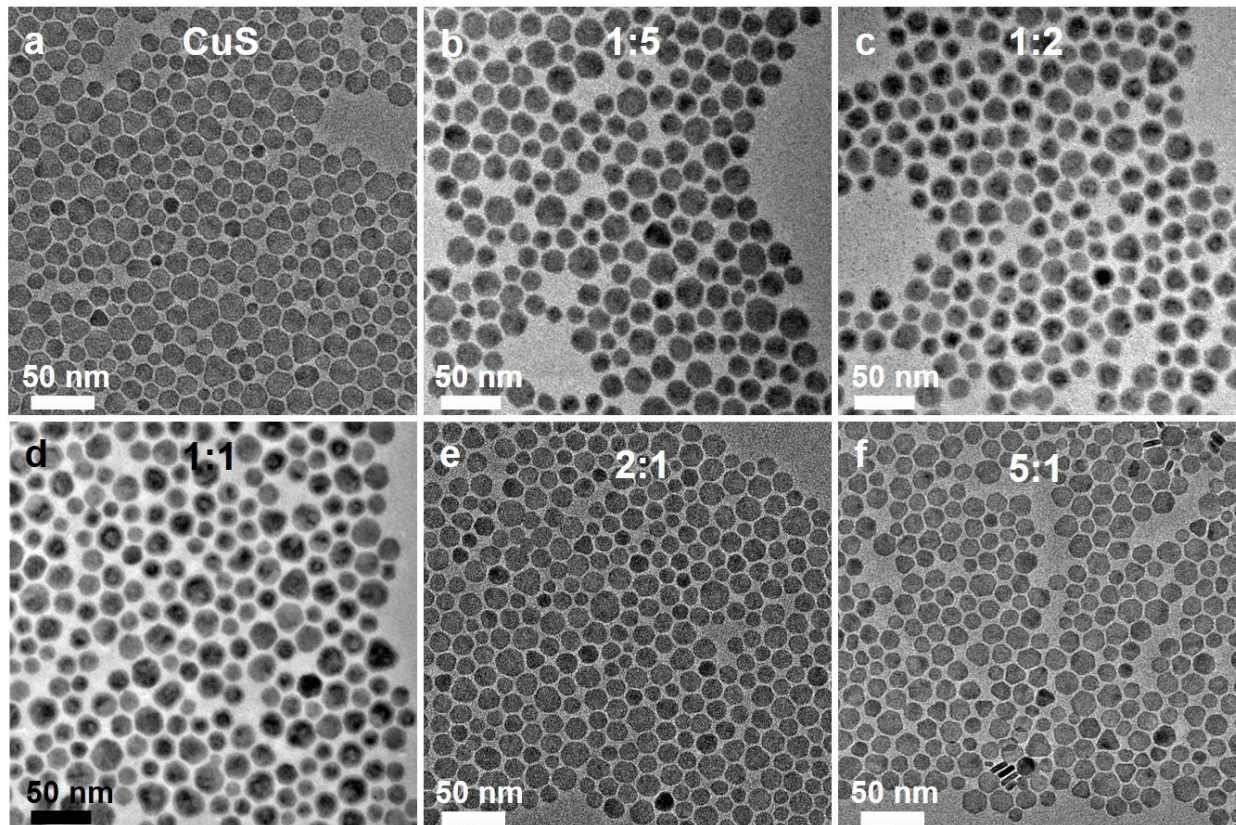

**Fig. S1** (a) TEM images of the as-synthesized  $\text{CuS}$  nanoplates by heat-up procedure. (b-f) TEM images of  $\text{Cu}_{2-x}\text{S}$  NCs collected by reacting the as-synthesized  $\text{CuS}$  NCs with  $\text{Cu}^{2+}$  ions, varying the precursor molar ratios of the  $\text{Cu}^{2+}$  in  $\text{CuCl}_2$  to the  $\text{Cu}^+$  in  $\text{CuS}$  (denoted as  $\text{Cu}^{2+}:\text{Cu}^+$ ) as dictated, in the presence of mild reducing agent, ascorbic acid (AA).

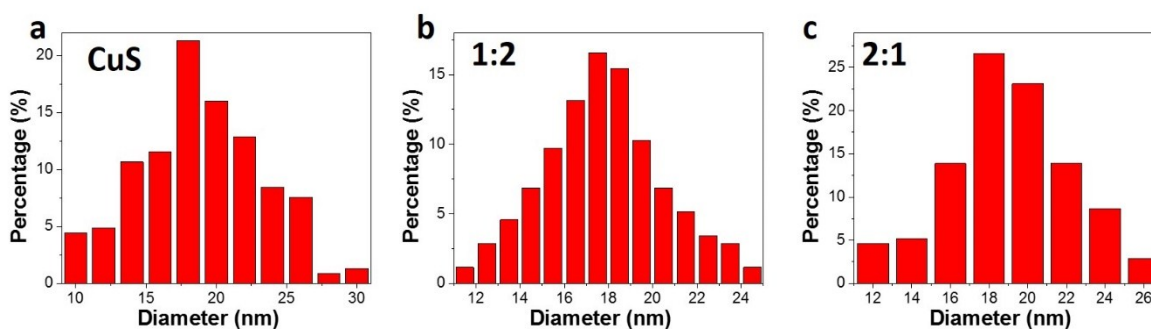

**Fig. S2** Size (in diameter) distribution histogram for the various  $\text{Cu}_{2-x}\text{S}$  nanoplates obtained by reacting the as-synthesized  $\text{CuS}$  NCs with  $\text{Cu}^{2+}$  in the presence of different precursor  $\text{Cu}^{2+}:\text{Cu}^+$  molar ratios as dictated. The average diameter of these typical samples are calculated to be

$18.0 \pm 2.5$  nm,  $18.1 \pm 2.6$  nm, and  $18.1 \pm 3.0$  nm, respectively. The overall particle sizes can be retained.

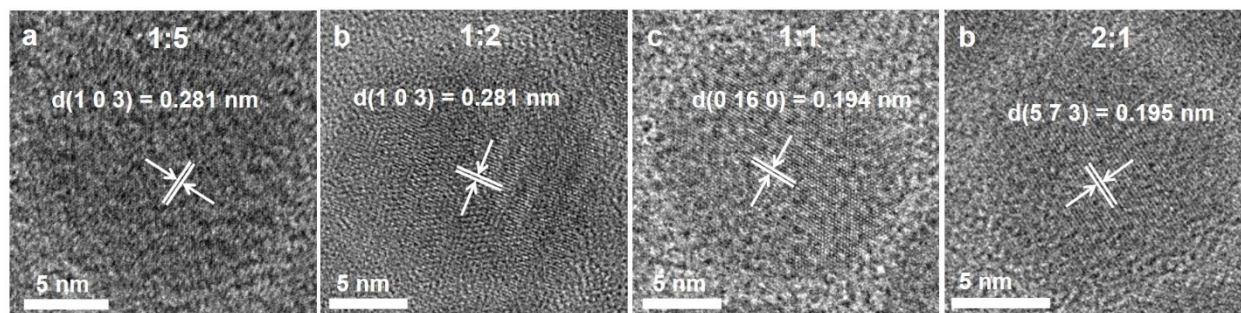

**Fig. S3** HRTEM images of  $\text{Cu}_{2-x}\text{S}$  NCs collected by reacting the as-synthesized CuS NCs with  $\text{Cu}^{2+}$  in the presence of different precursor  $\text{Cu}^{2+}:\text{Cu}^+$  molar ratios as dictated. The lattice spacing shown from panels a-d) can be respectively assigned to the (103), (103), (0160) and (573) planes of covellite (a-b), roxbyite (c) and chalcocite (d) phases.

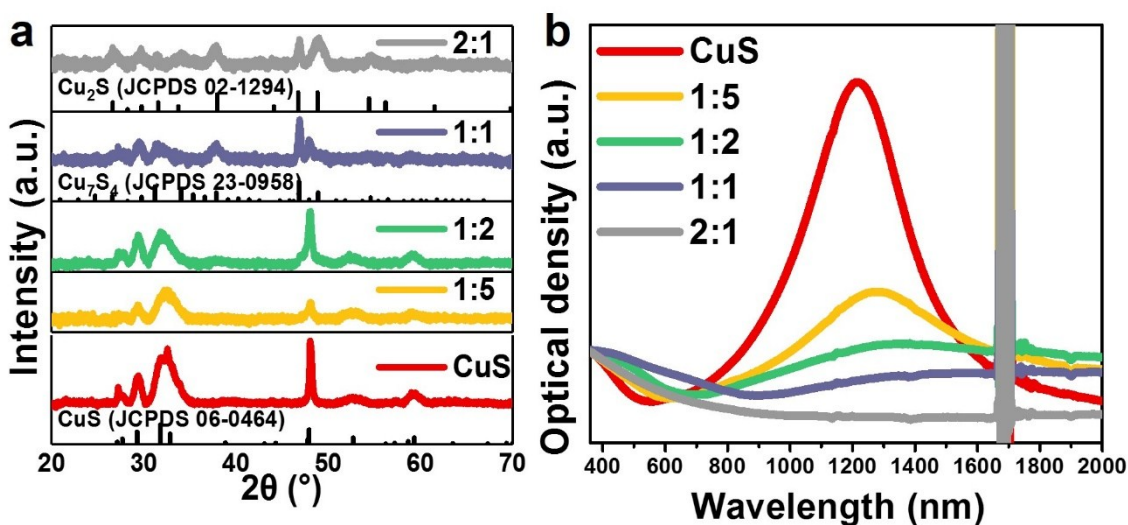

**Fig. S4** XRD patterns (a) and optical absorbance (b) of the various  $\text{Cu}_{2-x}\text{S}$  nanoplates achieved by reacting the as-synthesized CuS NCs with  $\text{Cu}^{2+}$  ions in the presence of different precursor  $\text{Cu}^{2+}:\text{Cu}^+$  precursor ratios as dictated. For comparison, the standard XRD patterns of covellite (CuS, JCPDS No. 06-0464), roxbyite ( $\text{Cu}_7\text{S}_4$ , JCPDS No. 23-0958) and chalcocite ( $\text{Cu}_2\text{S}$ , JCPDS No. 02-1294) are provided in panel a). The precursor  $\text{Cu}^{2+}:\text{Cu}^+$  ratios play a critical role in controlling the structure and the optical properties of the final samples, as evidenced by the evolution of



XRD patterns and optical spectra. The characterization and analysis confirm that the as-synthesized CuS nanoplates display well-defined NIR plasmon absorbance centered at around 1209 nm. However, the NIR plasmon absorbance damped and vanished with increasing the precursor  $\text{Cu}^{2+}:\text{Cu}^+$  molar ratios.

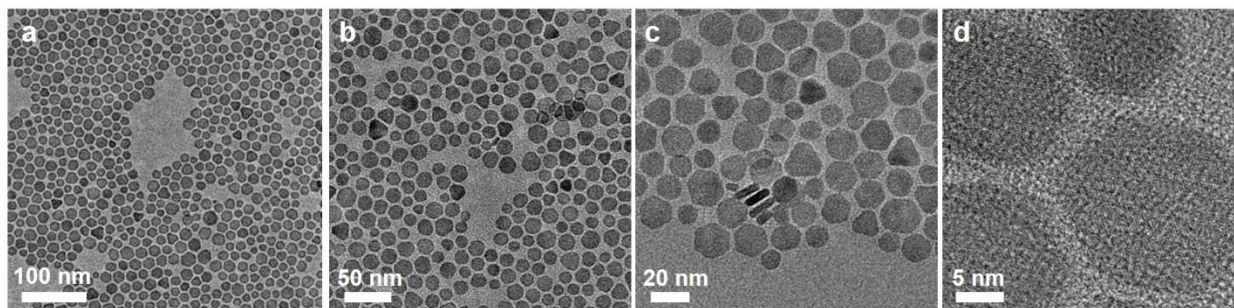

**Fig. S5** Representative TEM images of different magnifications of  $\text{Cu}_{2-x}\text{S}$  NCs achieved by reacting CuS with  $\text{Cu}^{2+}$  ions in the presence of AA. The TEM/HRTEM measurements were performed with a field emission gun working at 200 kV accelerating voltage.

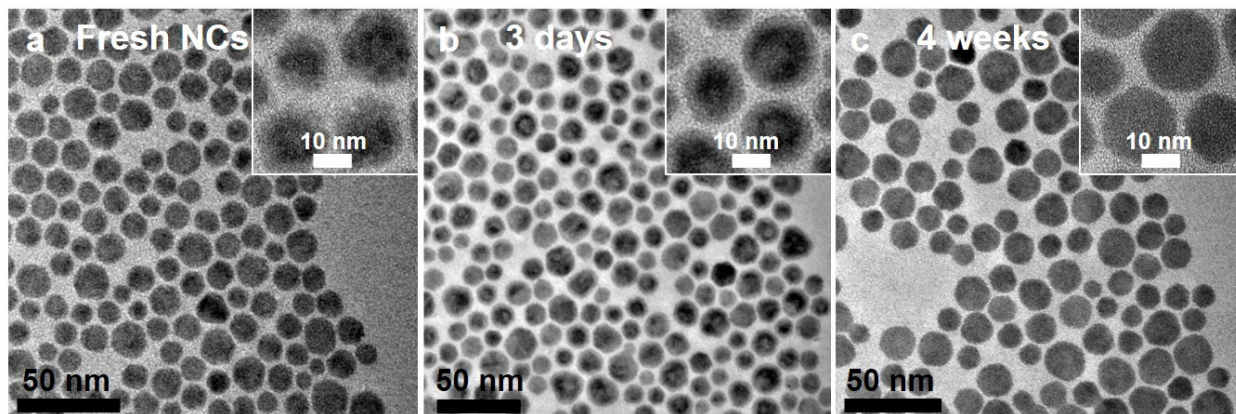

**Fig. S6** The TEM images of the as-synthesized fresh  $\text{CuS}@Cu_{2-x}\text{S}$  core-shell NCs (a) and the same sample stored in toluene solvent for 3 days (b) and 4 weeks (c), respectively. The TEM/HRTEM measurements were performed with a field emission gun working at 100 kV accelerating voltage.

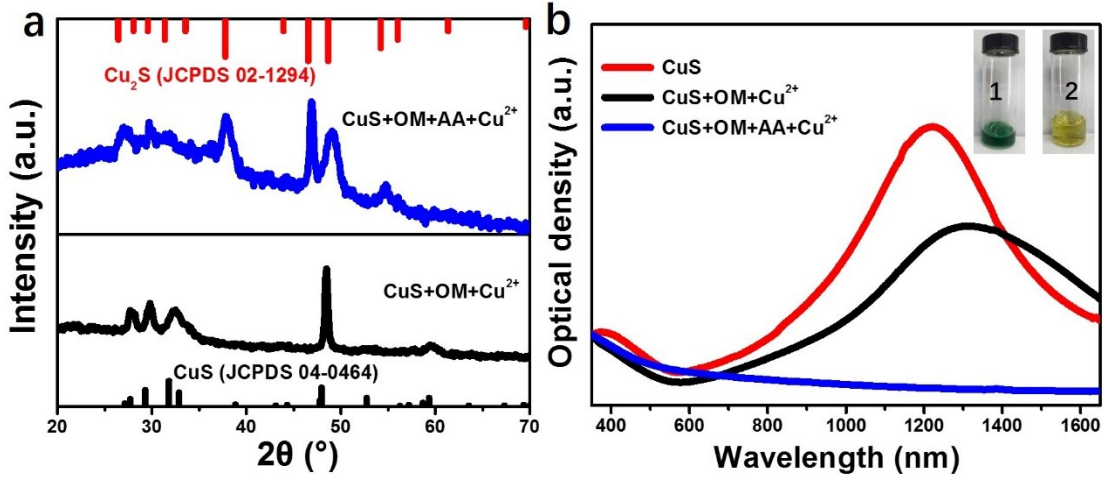

**Fig. S7** The XRD patterns (a) and optical spectra (b) of the as-synthesized CuS, and NCs collected in the presence of OM alone (black curves), and of both AA and OM (the blue curves). The photos of the supernatant collected after centrifugation in the presence of OM alone (No. 1 of the insets in panel b), and of both AA and OM (No. 2 of the insets in panel b) are also provided.

## 2. Characterization of $\text{Cu}_{2-x}\text{S}$ NCs collected at different time by reacting $\text{CuS}$ NCs with $\text{Cu}^{2+}$ ions

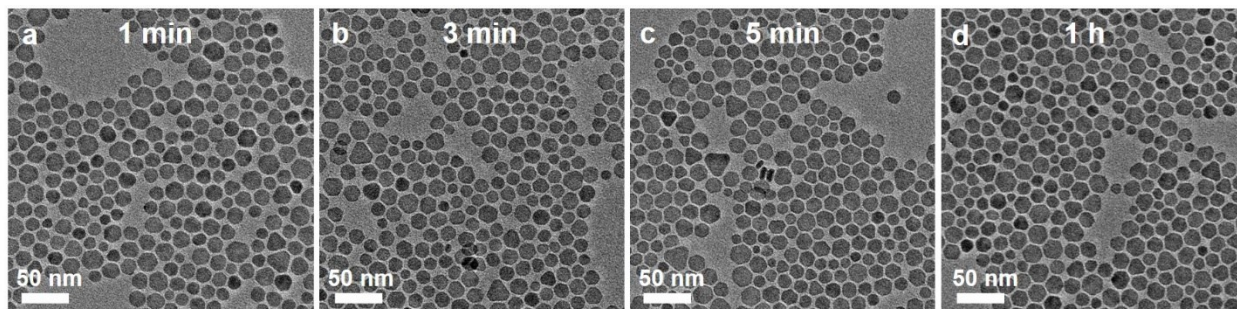

**Fig. S8** The evolution of TEM images (a-d) of the various  $\text{Cu}_{2-x}\text{S}$  NCs collected at different time as dictated, by reacting  $\text{CuS}$  NCs with  $\text{Cu}^{2+}$  in the presence of AA. The precursor  $\text{Cu}^{2+}:\text{Cu}^+$  molar ratio is 2:1.

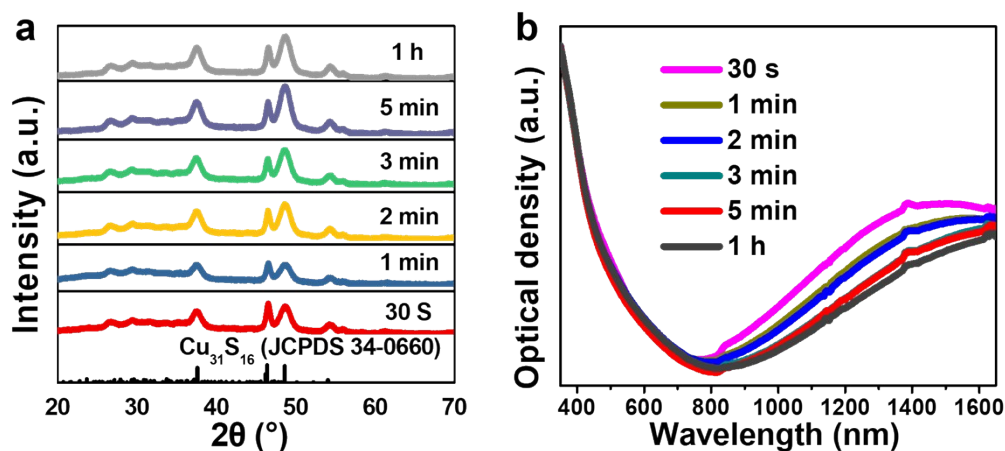

**Fig. S9** XRD patterns (a) and optical absorbance (b) of the various  $\text{Cu}_{2-x}\text{S}$  NCs collected at different time as dictated, by reacting  $\text{CuS}$  NCs with  $\text{Cu}^{2+}$  in the presence of AA. The precursor  $\text{Cu}^{2+}:\text{Cu}^+$  molar ratio is 3:2. For comparison, the standard XRD pattern of chalcocite ( $\text{Cu}_{31}\text{S}_{16}$ , JCPDS No.34-0660) is provided in panel a).

### 3. Microwave absorption properties of various Cu<sub>2-x</sub>S/paraffin composites

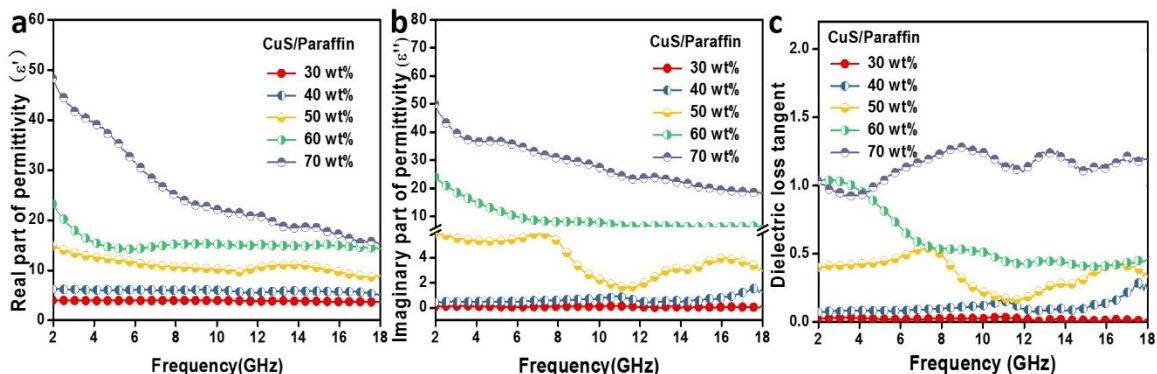

**Fig. S10** Frequency dependence on real permittivity (a), imaginary permittivity (b) and dielectric loss tangent (c) of the CuS/paraffin composites with different CuS NCs loadings as dictated.

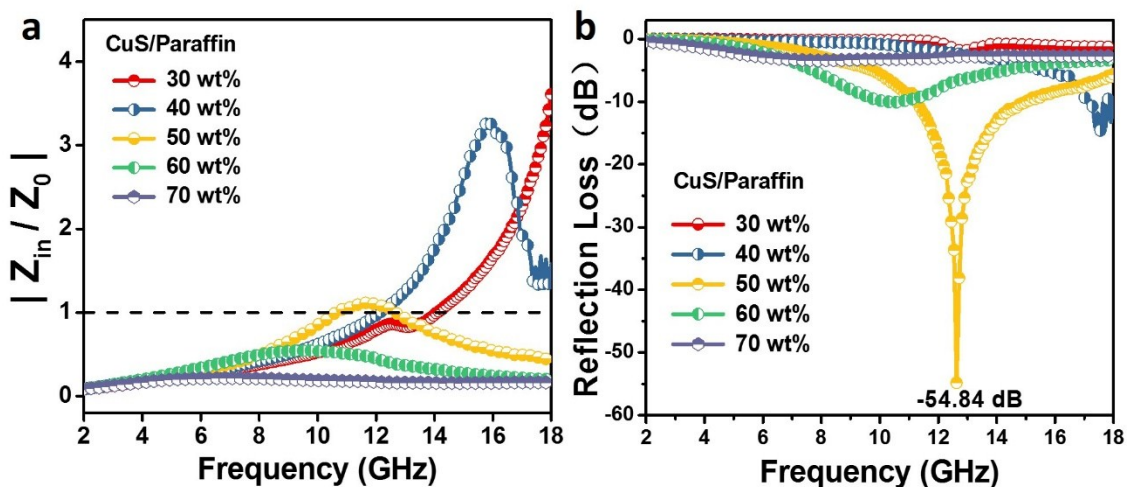

**Fig. S11** The normalized impedance (a) and microwave reflection losses (b) of the CuS/paraffin composites with different CuS loadings at certain thickness of 1.95 mm in the frequency range of 2-18 GHz.



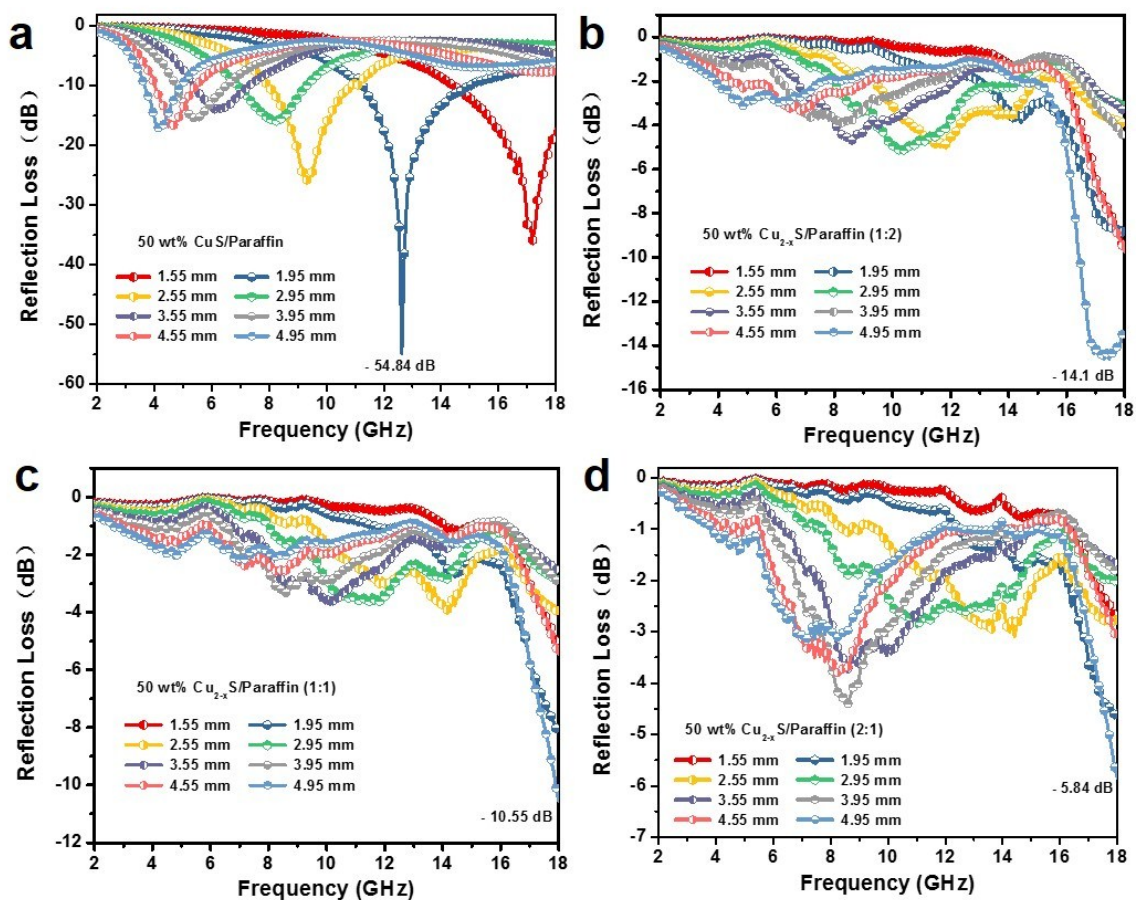

**Fig. S12** The microwave reflection losses with various thicknesses of 50 wt%  $\text{Cu}_{2-x}\text{S}$ /paraffin composites in the frequency range of 2-18 GHz. The  $\text{Cu}_{2-x}\text{S}$  NCs were achieved by reacting CuS NCs with  $\text{Cu}^{2+}$ , in the presence of different precursor  $\text{Cu}^{2+}:\text{Cu}^+$  precursor ratios as dictated in each panel.



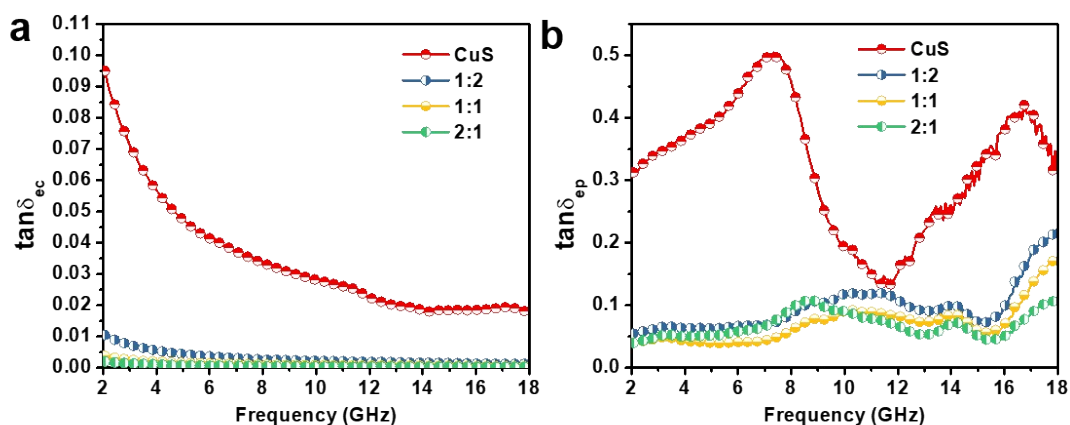

**Fig. S13** Loss tangent  $\tan\delta_{ec}$  (a) and  $\tan\delta_{ep}$  (b) of 50 wt%  $\text{Cu}_{2-x}\text{S}$ /paraffin composites in the frequency range of 2-18 GHz. The  $\text{Cu}_{2-x}\text{S}$  NCs were achieved by reacting CuS NCs with  $\text{Cu}^{2+}$ , in the presence of different precursor  $\text{Cu}^{2+}:\text{Cu}^+$  molar ratios as dictated.

**Table S1.** The microwave absorbing properties of the CuS/paraffin and the various  $\text{Cu}_{2-x}\text{S}$ /paraffin composites. The  $\text{Cu}_{2-x}\text{S}$  NCs are achieved by reacting CuS NCs with different amounts of  $\text{Cu}^{2+}$  cations (denoted as precursor  $\text{Cu}^{2+}:\text{Cu}^+$  ratios as dictated in the first column). The loading in all cases is 50 wt %.

| Samples                         | RL (dB) | $f_r$ (GHz) | Absorption bandwidth (GHz) |         | Thickness d (mm) |
|---------------------------------|---------|-------------|----------------------------|---------|------------------|
|                                 |         |             | <-8 dB                     | <-10 dB |                  |
| CuS                             | -54.84  | 12.63       | 5.6                        | 3.8     | 1.95             |
|                                 | -42.91  | 8.96        | 3.9                        | 2.7     | 2.65             |
| $\text{Cu}_{2-x}\text{S}$ (1:2) | -20.63  | 16.84       | >2                         | >1.9    | 5.1              |
| $\text{Cu}_{2-x}\text{S}$ (1:1) | -14.42  | 18          | >1                         | >0.6    | 5.1              |
| $\text{Cu}_{2-x}\text{S}$ (2:1) | -7.812  | 18          | -                          | -       | 5.1              |

#### 4. Calculation of free carrier (hole) density in the various NCs

According to the Drude model, the frequency  $w_{LSPR}$  of the localized surface plasmon resonance can be described as: [1-2]

$$W_{LSPR} = \sqrt{\frac{w_p^2}{1 + 2\varepsilon_m} - \gamma^2}$$

Where  $\gamma$  represents the line width of the plasmon resonance band,  $\varepsilon_m$  is the dielectric constant of the environment surrounding the NCs ( $\varepsilon_m = 2.38$  for toluene) and  $w_p$  is the plasma frequency. The  $w_{LSPR}$  and  $\gamma$  can be calculated from the experimental spectrum (see Fig. S5b). The relationship between bulk plasma frequency ( $w_p$ ) and free carrier density ( $N_h$ ) is:

$$W_p = \sqrt{\frac{N_h e^2}{\varepsilon_0 m_h}}$$

where  $m_h$  is the hole effective mass, approximated as  $0.8m_0$  (where  $m_0$  is the electron mass), and  $e$  is the electron charge. From the above Eq., the  $N_h$  for the as-synthesized covellite NCs and the various  $Cu_{2-x}S$  NCs can be estimated and summarized in Table S2.

**Table S1** The summary on the free carriers (holes) density of the as-synthesized covellite CuS and the various  $Cu_{2-x}S$  NCs prepared by reacting CuS NCs with  $Cu^{2+}$  ions in the presence of different starting  $Cu^{2+}:Cu^+$  molar ratios as dictated.

| Samples           | $N_h$<br>( $cm^{-3}$ ) |
|-------------------|------------------------|
| CuS               | $3.863 \times 10^{21}$ |
| $Cu_{2-x}S$ (1:2) | $3.262 \times 10^{21}$ |
| $Cu_{2-x}S$ (1:1) | $2.328 \times 10^{21}$ |
| $Cu_{2-x}S$ (2:1) | 0                      |

## References

- [1] J. M. Luther, P. K. Jain, T. Ewers and A. P. Alivisatos, *Nat. Mater.* **2011**, *10*, 361-366.
- [2] Y. Xie, A. Riedinger, M. Prato, A. Casu, A. Genovese, P. Guardia, S. Sottini, C. Sangregorio, K. Miszta, S. Ghosh, T. Pellegrino and L. Manna, *J. Am. Chem. Soc.* **2013**, *135*, 17630-17637.
